# Supplementary material for: Rational design of a highly porous electronic scaffold with concurrent enhancement in cell behaviors and differentiation under electrical stimulation
Source: Royal Society of Chemistry journal article supplement (doi:10.1039/d1tb01260f), 2021-01-01
Supplement: d1tb01260f1.pdf [file d1tb01260f1.pdf]

Table S1. Primer sequences for qPCR

| Gene           | Forward                     | Reverse                     |
|----------------|-----------------------------|-----------------------------|
| <b>GAPDH</b>   | 5'-CAAGGCTGAGAACGGGAAGC-3'  | 5'-AGGGGGCAGAGATGATGACC-3'  |
| <b>COL 1a1</b> | 5'-ACCGCCCTCCTGACGCAC-3'    | 5'-GCAGACGCAGATCCGGCAG-3'   |
| <b>RUNX2</b>   | 5'-TTCATCCCTCACTGAGAG-3'    | 5'-TCAGCGTCAACACCATCA-3'    |
| <b>ALP</b>     | 5'-AACATCAGGGACATTGACG-3'   | 5'-GTATCTCGGTTTGAAGCTC-3'   |
| <b>OCN</b>     | 5'-TCACAGTCCGGATTGAGCTCA-3' | 5'-CAAAGGTGCAGCCTTTGTGTC-3' |

4

5

6

7

8

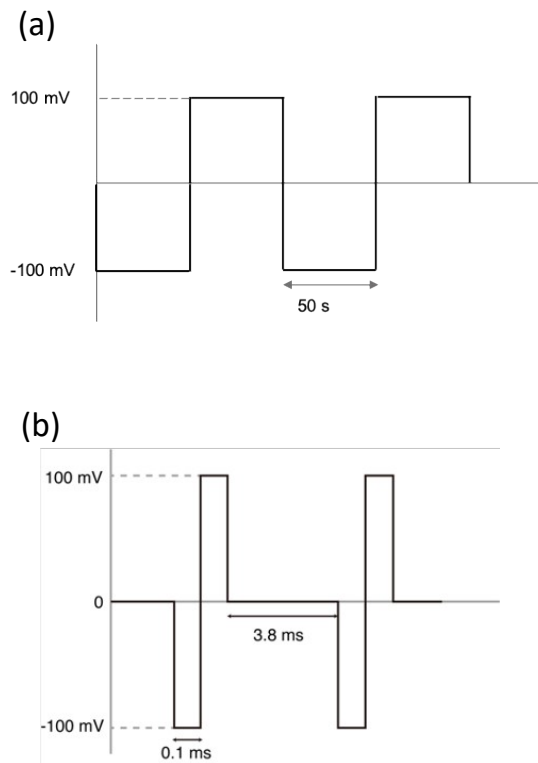

Figure S1 (a) Wave model of electrical stimulation for hASC osteogenesis (b) Wave model of electrical stimulation for PC12 neural differentiation

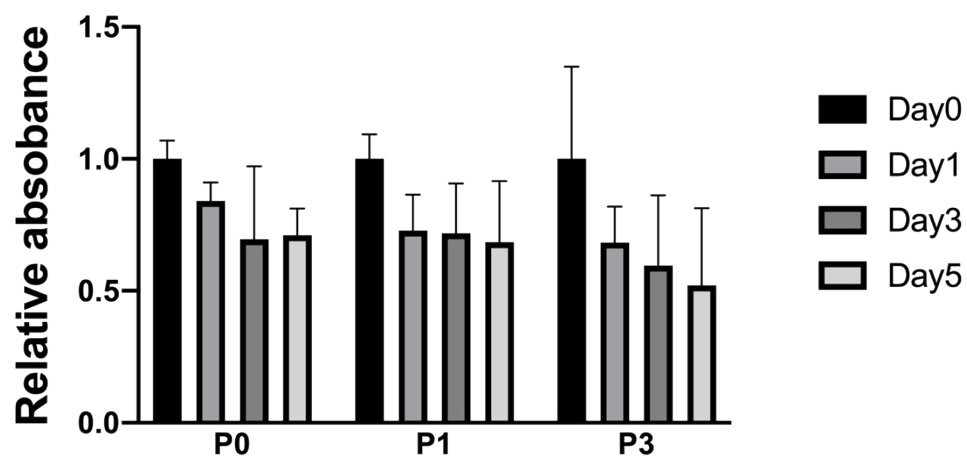

Figure S2. Cell activity of PC12 cultured in PEDOT:PSS/MWCNT extract tested by Alamar Blue assay

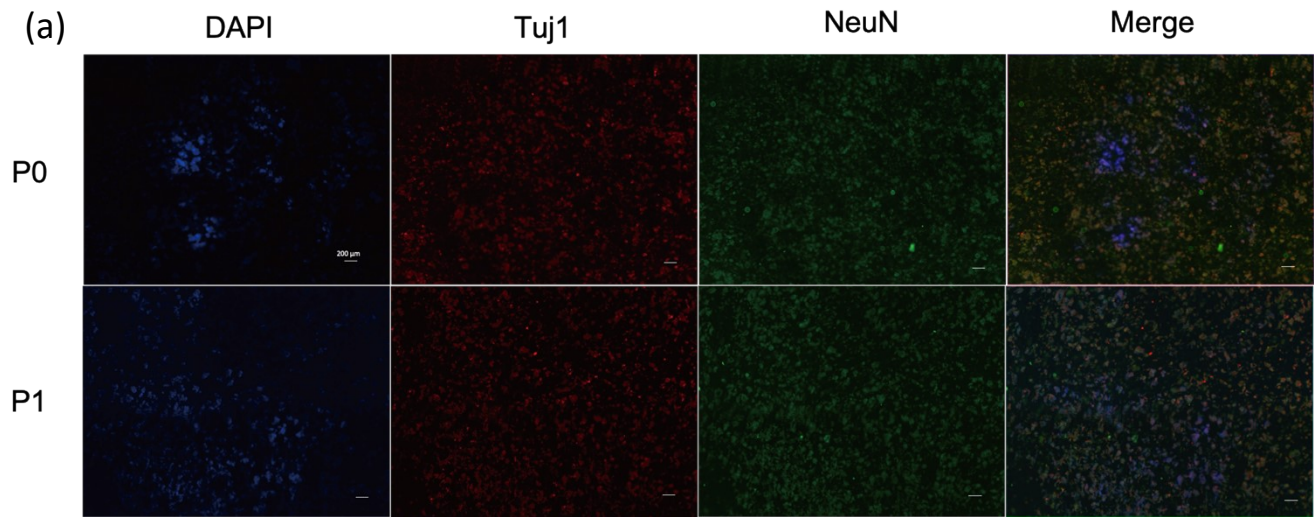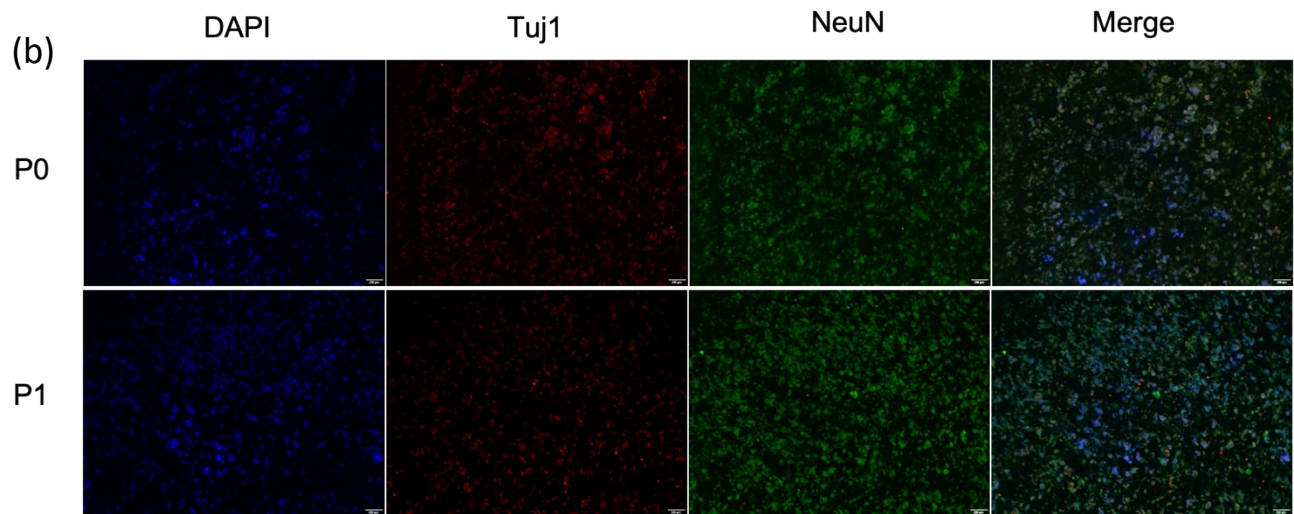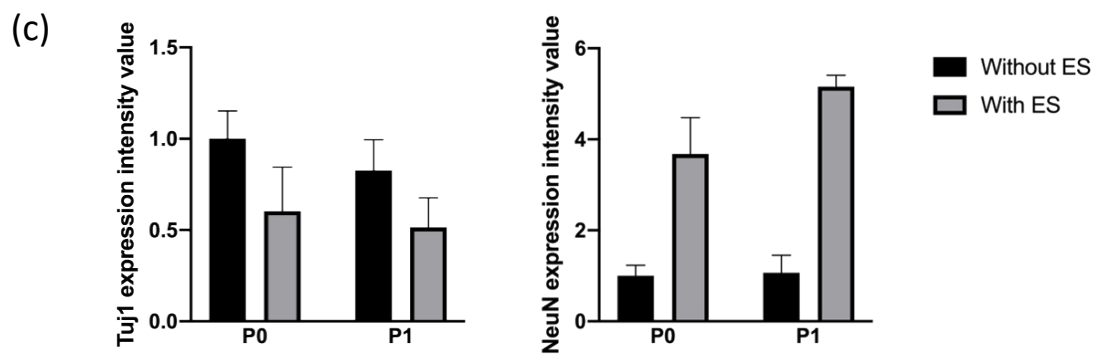

Figure S3. (a) Gene expression of PC12 neurogenesis after 5 days differentiation without ES. (b) Gene expression of PC12 neurogenesis after 5 days differentiation with ES. (c) Semi-quantification of gene expression measured from immunofluorescence images. Expression intensity are normalized by P0 without ES group.

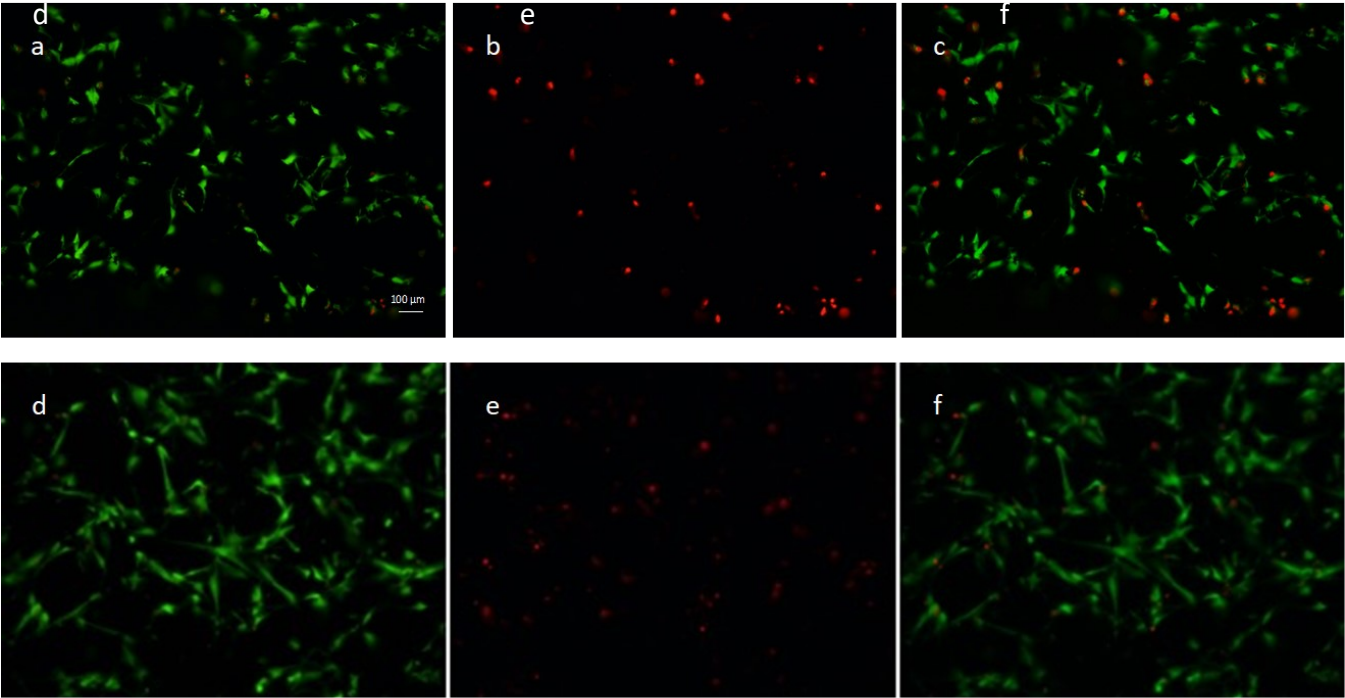

Figure S4. Live/Dead images of hASCs in P3 scaffolds at (a-c) day 1 and (d-f) day 7.

# P0

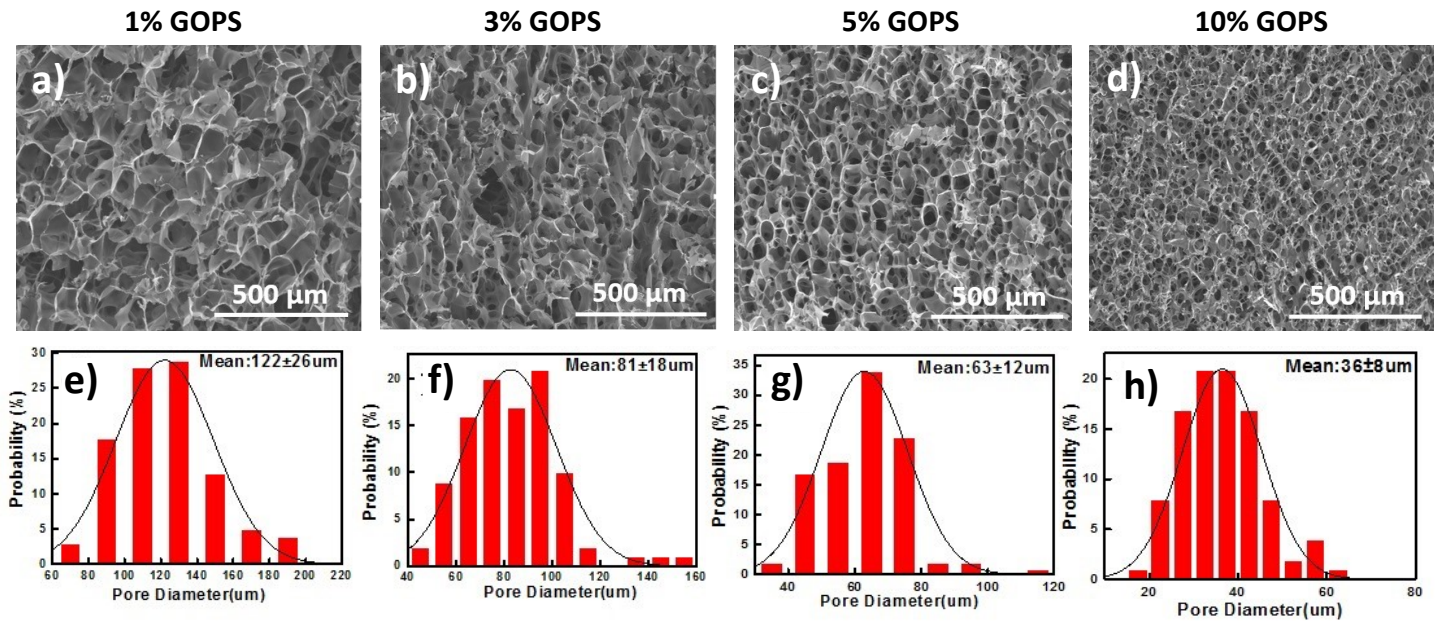

Figure S5. SEM images and the pore size distribution of P0 scaffolds with (a, e)1%, (b, f)3%, (c, g)5%, and (d, h)10 % GOPS.
